# Supplementary material
Source: MDPI journal article supplement (https://www.mdpi.com/2079-6412/11/5/586)
Supplement: s1 [file s1]

# Pseudo-Planar Organic Heterojunctions by Sequential Printing of Quasi-Miscible Inks

Ana-Gianina Gereanu <sup>1</sup>, Camillo Sartorio <sup>1</sup>, Aurelio Bonasera <sup>1,2</sup>, Giuliana Giuliano <sup>1</sup>, Sebastiano Cataldo <sup>1</sup>, Michelangelo Scopelliti <sup>1,2</sup>, Giuseppe Arrabito <sup>1,\*</sup> and Bruno Pignataro <sup>1,2,\*</sup>

<sup>1</sup> Department of Physics and Chemistry-Emilio Segrè, University of Palermo, viale delle Scienze, bdg. 17, Palermo 90128, Italy; gianina.gereanu@gmail.com (A.-G.G.); camillo.sartorio@enea.it (C.S.); aurelio.bonasera@unipa.it (A.B.); giuliana.giuliano@unipa.it (G.G.); sebastiano.cataldo@enea.it (S.C.); michelangelo.scopelliti@unipa.it (M.S.)

<sup>2</sup> INSTM-Palermo Research Unit, viale delle Scienze, bdg. 17, 90128 Palermo, Italy

\* Correspondence: giuseppedomenico.arrabito@unipa.it (G.A.); bruno.pignataro@unipa.it (B.P.)

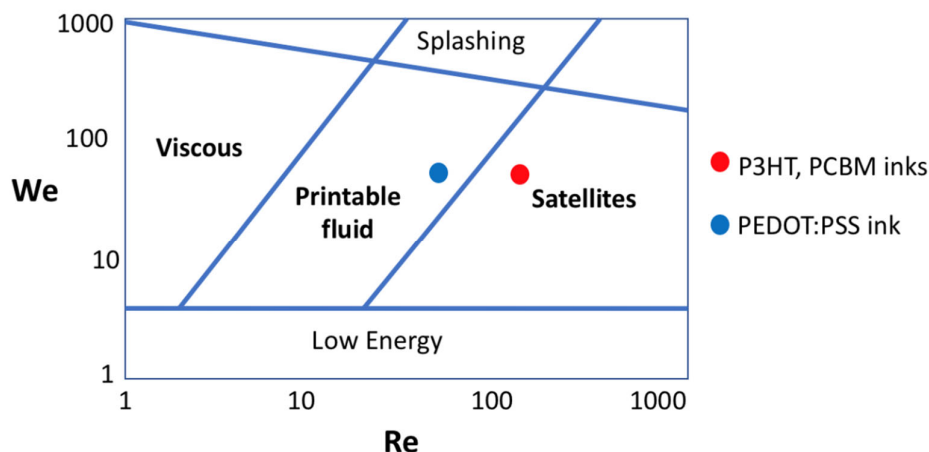

Figure S1. Derby plots for P3HT, PCBM and PEDOT:PSS inks prepared in this study.

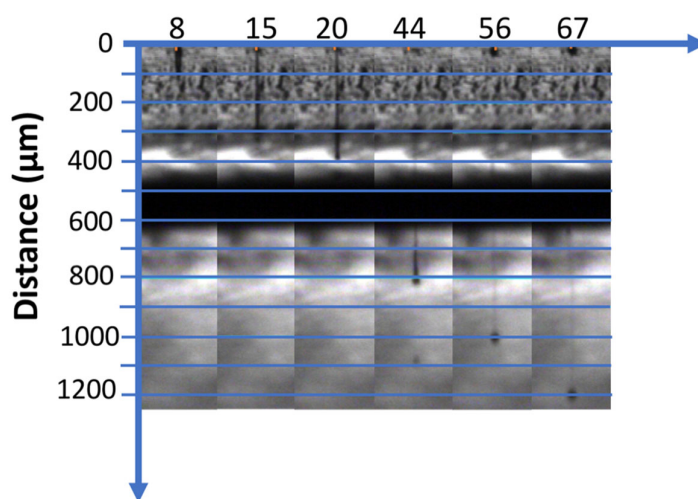

Figure S2. Stroboscopic images showing PEDOT:PSS ink deposition process at a jetting voltage equal to 23 V. The droplet is subjected to an elongation process which eventually does not lead to breakup.

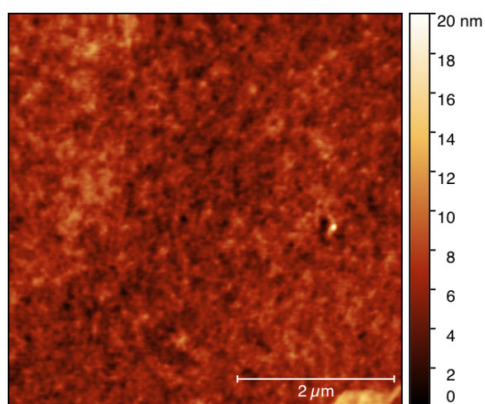

**Figure S3.** AFM characterization of the P3HT layer printed at 40 V.

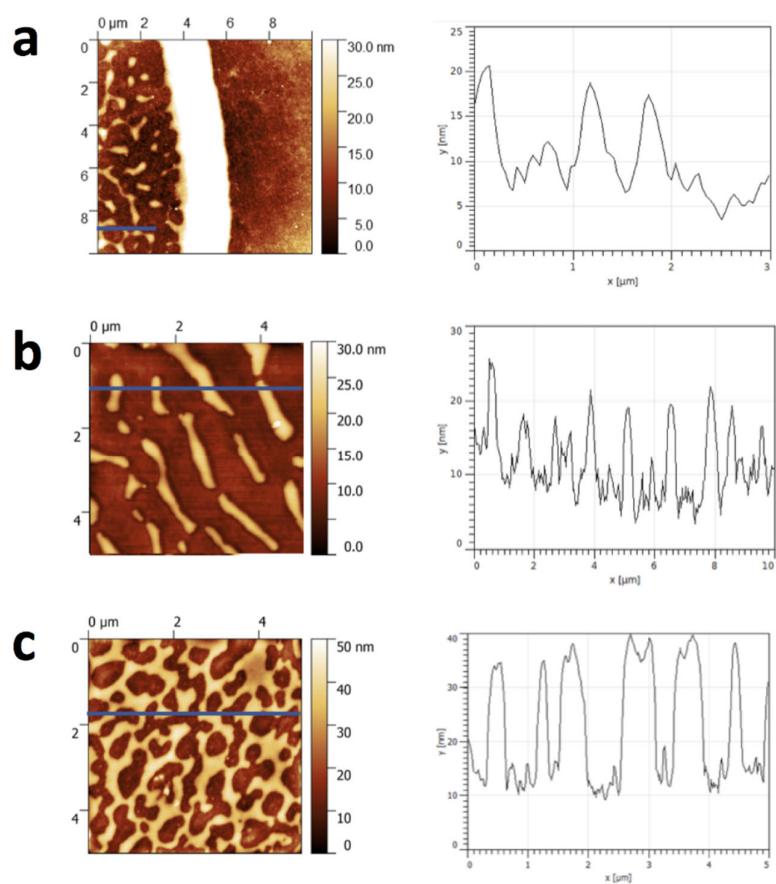

**Figure S4.** Section analysis of the (a) border of the P3HT layer (27 V jetting voltage); border of the P3HT-PCBM layer, being the PCBM layer printed at 27 V (b) or 40 V (c).

**Table S1.** Solvents used for printed solar cells.

| Printing Materials      | Printing Medium                                                                     | References |
|-------------------------|-------------------------------------------------------------------------------------|------------|
| Carbon nanomaterials    | Isopropanol                                                                         | [1]        |
|                         | Water/propylene glycol                                                              | [2]        |
| Inorganic dopants       | Alcohols, water, and their mixtures                                                 | [3]        |
|                         | Acetonitrile                                                                        | [4]        |
|                         | Alcohols                                                                            | [5,6]      |
|                         | DMF                                                                                 | [7]        |
|                         | DMSO                                                                                | [8–10]     |
| Metals or Metal Oxides  | Glycols                                                                             | [3,11,12]  |
|                         | Glycols mixtures                                                                    | [13,14]    |
|                         | Hexanethiol/dodecanethiol                                                           | [15]       |
|                         | Triton X-100                                                                        | [16]       |
|                         | Water                                                                               | [17]       |
|                         | Water mixtures                                                                      | [14,18,19] |
|                         | o-Xylene/indane/tetrahydronaphthalene                                               | [20]       |
| Minerals (chalcopyrite) | Ethanol/ethanolamine                                                                | [21]       |
|                         | Ethylene glycol mixtures                                                            | [13,21–23] |
| P3HT:PCBM               | Halogenated aromatic solvents (chlorobenzene, o-dichlorobenzene) and their mixtures | [24–30]    |
| PEDOT:PSS               | Chlorobenzene                                                                       | [31]       |
|                         | Ethylene glycol mixtures                                                            | [32,33]    |
|                         | Water                                                                               | [28]       |
| Perovskites             | Alcohols                                                                            | [34,35]    |
|                         | $\gamma$ -Butyrolactone                                                             | [36,37]    |
|                         | DMF                                                                                 | [38–44]    |
|                         | DMSO / $\gamma$ -butyrolactone                                                      | [45,46]    |
|                         | DMF/DMSO mixtures                                                                   | [47–49]    |
|                         | Chloroform/trichloroethylene                                                        | [50]       |
| Polymers                | DMSO                                                                                | [51]       |
|                         | Water                                                                               | [52,53]    |
|                         | Various solvents/mixtures                                                           | [54,55]    |

**Table S2.** Summary of the Mean values of the OSC performances obtained from three different measurements; the standard deviation around the mean value of each parameter is reported in brackets.

| Inkjet Printed Component         | $J_{sc}$<br>( $\text{mA}\cdot\text{cm}^{-2}$ ) | $V_{oc}$<br>(V)     | FF                  | PCE<br>(%)           |
|----------------------------------|------------------------------------------------|---------------------|---------------------|----------------------|
| P3HT:PCBM PHJ                    | 0.67 ( $\pm 0.33$ )                            | 0.33 ( $\pm 0.07$ ) | 0.30 ( $\pm 0.03$ ) | 0.062 ( $\pm 0.02$ ) |
| P3HT:PCBM BHJ                    | 2.92 ( $\pm 0.07$ )                            | 0.58 ( $\pm 0.03$ ) | 0.33 ( $\pm 0.01$ ) | 0.56 ( $\pm 0.05$ )  |
| PEDOT:PSS HTL +<br>P3HT:PCBM BHJ | 3.76 ( $\pm 1.30$ )                            | 0.45 ( $\pm 0.04$ ) | 0.26 ( $\pm 0.07$ ) | 0.44 ( $\pm 0.20$ )  |

## References

1. Dodoo-Arhin, D.; Howe, R.C.T.; Hu, G.; Zhang, Y.; Hiralal, P.; Bello, A.; Amaratunga, G.; Hasan, T. Inkjet-printed graphene electrodes for dye-sensitized solar cells. *Carbon* **2016**, *105*, 33–41, doi:10.1016/j.carbon.2016.04.012.
2. Kastner, J.; Gnatiuk, I.; Wagner, M.; Holzinger, D.; Rudelstorfer, V.; Hesser, G.; Fuchsbaue, A.; Hild, S. Grinded nano-graphite inkjet inks for application in organic solar cells. *Nanotechnology* **2019**, *30*, 45601, doi:10.1088/1361-6528/aae67a.
3. Stüwe, D.; Mager, D.; Biro, D.; Korvink, J.G. Inkjet technology for crystalline silicon photovoltaics. *Adv. Mater.* **2015**, *27*, 599–626, doi:10.1002/adma.201403631.
4. Lee, D.H.; Chang, Y.J.; Herman, G.S.; Chang, C.H. A general route to printable high-mobility transparent amorphous oxide semiconductors. *Adv. Mater.* **2007**, *19*, 843–847, doi:10.1002/adma.200600961.

5. Kim, J.; Na, S.I.; Kim, H.K. Inkjet printing of transparent InZnSnO conducting electrodes from nano-particle ink for printable organic photovoltaics. *Sol. Energy Mater. Sol. Cells* **2012**, *98*, 424–432, doi:10.1016/j.solmat.2011.11.050.
6. Singh, A.; Gupta, S.K.; Garg, A. Inkjet printing of NiO films and integration as hole transporting layers in polymer solar cells. *Sci. Rep.* **2017**, *7*, 1775, doi:10.1038/s41598-017-01897-9.
7. Oh, Y.; Lee, S.-N.; Kim, H.-K.; Kim, J. UV-assisted chemical sintering of inkjet-printed TiO<sub>2</sub> photoelectrodes for low-temperature flexible dye-sensitized solar cells. *J. Electrochem. Soc.* **2012**, *159*, H777–H781, doi:10.1149/2.011210jes.
8. Lin, X.; Kavalakkatt, J.; Lux-Steiner, M.C.; Ennaoui, A. Inkjet-printed Cu<sub>2</sub>ZnSn(S, Se)<sub>4</sub> solar cells. *Adv. Sci.* **2015**, *2*, 1500028, doi:10.1002/advs.201500028.
9. Uhl, A.R.; Katahara, J.K.; Hillhouse, H.W. Molecular-ink route to 13.0% efficient low-bandgap CuIn(S,Se)<sub>2</sub> and 14.7% efficient Cu(In,Ga)(S,Se)<sub>2</sub> solar cells. *Energy Environ. Sci.* **2016**, *9*, 130–134, doi:10.1039/c5ee02870a.
10. Lin, X.; Madhavan, V.E.; Kavalakkatt, J.; Hinrichs, V.; Lauermann, I.; Lux-Steiner, M.C.; Ennaoui, A.; Klenk, R. Inkjet-printed CZTSSe absorbers and influence of sodium on device performance. *Sol. Energy Mater. Sol. Cells* **2018**, *180*, 373–380, doi:10.1016/j.solmat.2017.09.003.
11. Hersh, P.A.; Curtis, C.J.; van Hest, M.F.A.M.; Kreuder, J.J.; Pasquarelli, R.; Miedaner, A.; Ginley, D.S. Inkjet printed metallizations for Cu(In<sub>1-x</sub>Ga<sub>x</sub>)Se<sub>2</sub> photovoltaic cells. *Prog. Photovoltaics Res. Appl.* **2011**, *19*, 973–976, doi:10.1002/pip.1105.
12. Na, S.-I.; Park, D.-W.; Kim, S.-S.; Yang, S.-Y.; Lee, K.; Lee, M.-H. ITO-free flexible polymer solar cells with ink-jet-printed Ag grids. *Semicond. Sci. Technol.* **2012**, *27*, 125002, doi:10.1088/0268-1242/27/12/125002.
13. Lin, X.; Klenk, R.; Wang, L.; Köhler, T.; Albert, J.; Fiechter, S.; Ennaoui, A.; Lux-Steiner, M.C. 11.3% efficiency Cu(In,Ga)(S,Se)<sub>2</sub> thin film solar cells via drop-on-demand inkjet printing. *Energy Environ. Sci.* **2016**, *9*, 2037–2043, doi:10.1039/C6EE00587J.
14. Yadav, B.S.; Dey, S.R.; Dhage, S.R. Effective ink-jet printing of aqueous ink for Cu(In,Ga)Se<sub>2</sub> thin film absorber for solar cell application. *Sol. Energy* **2019**, *179*, 363–370, doi:10.1016/j.solener.2019.01.003.
15. Barbé, J.; Eid, J.; Ahlswede, E.; Spiering, S.; Powalla, M.; Agrawal, R.; Del Gobbo, S. Inkjet printed Cu(In,Ga)S<sub>2</sub> nanoparticles for low-cost solar cells. *J. Nanoparticle Res.* **2016**, *18*, 379, doi:10.1007/s11051-016-3686-5.
16. Bernacka-Wojcik, I.; Senadeera, R.; Wojcik, P.J.; Silva, L.B.; Doria, G.; Baptista, P.; Aguas, H.; Fortunato, E.; Martins, R. Inkjet printed and “doctor blade” TiO<sub>2</sub> photodetectors for DNA biosensors. *Biosens. Bioelectron.* **2010**, *25*, 1229–1234, doi:10.1016/j.bios.2009.09.027.
17. Cranton, W.M.; Wilson, S.L.; Ranson, R.; Koutsogeorgis, D.C.; Chi, K.; Hedgley, R.; Scott, J.; Lipiec, S.; Spiller, A.; Speakman, S. Excimer laser processing of inkjet-printed and sputter-deposited transparent conducting SnO<sub>2</sub>:Sb for flexible electronics. *Thin Solid Films* **2007**, *515*, 8534–8538, doi:10.1016/j.tsf.2007.03.118.
18. Cherrington, R.; Hughes, D.J.; Senthilarasu, S.; Goodship, V. Inkjet-printed TiO<sub>2</sub> nanoparticles from aqueous solutions for dye-sensitized solar cells (DSSCs). *Energy Technol.* **2015**, *3*, 866–870, doi:10.1002/ente.201500096.
19. Brisse, R.; Faddoul, R.; Bourgeteau, T.; Tondelier, D.; Leroy, J.; Campidelli, S.; Berthelot, T.; Geffroy, B.; Joussetme, B. Inkjet printing NiO-Based p-type dye-sensitized solar cells. *ACS Appl. Mater. Interfaces* **2017**, *9*, 2369–2377, doi:10.1021/acsami.6b12912.
20. Eggenhuisen, T.M.; Galagan, Y.; Biezemans, A.F.K.V.; Slaats, T.M.W.L.; Voorthuizen, W.P.; Kommeren, S.; Shanmugam, S.; Teunissen, J.P.; Hadipour, A.; Verhees, W.J.H.; et al. High efficiency, fully inkjet printed organic solar cells with freedom of design. *J. Mater. Chem. A* **2015**, *3*, 7255–7262, doi:10.1039/c5ta00540j.
21. Wang, W.; Su, Y.-W.; Chang, C. Inkjet printed chalcopyrite CuIn<sub>1-x</sub>Ga<sub>x</sub>Se<sub>2</sub> thin film solar cells. *Sol. Energy Mater. Sol. Cells* **2011**, *95*, 2616–2620, doi:10.1016/j.solmat.2011.05.011.
22. Wang, L.; Lin, X.; Ennaoui, A.; Wolf, C.; Lux-Steiner, M.C.; Klenk, R. Solution-processed In<sub>2</sub>S<sub>3</sub> buffer layer for chalcopyrite thin film solar cells. *EPJ Photovoltaics* **2016**, *7*, 70303, doi:10.1051/epjpv/2016001.
23. Yadav, B.S.; Ranjan Day, S.; Dhage, S.R. Chalcopyrite CIGS absorber layer by inkjet printing for photovoltaic application. *Mater. Today Proc.* **2017**, *4*, 12480–12483, doi:10.1016/j.matpr.2017.10.047.
24. Hoth, C.N.; Choulis, S.A.; Schilinsky, P.; Brabec, C.J. High photovoltaic performance of inkjet printed polymer:fullerene blends. *Adv. Mater.* **2007**, *19*, 3973–3978, doi:10.1002/adma.200700911.
25. Aernouts, T.; Aleksandrov, T.; Girotto, C.; Genoe, J.; Poortmans, J. Polymer based organic solar cells using ink-jet printed active layers. *Appl. Phys. Lett.* **2008**, *92*, 33306, doi:10.1063/1.2833185.
26. Hoth, C.N.; Schilinsky, P.; Choulis, S.A.; Brabec, C.J. Printing highly efficient organic solar cells. *Nano Lett.* **2008**, *8*, 2806–2813, doi:10.1021/nl801365k.
27. Hoth, C.N.; Choulis, S.A.; Schilinsky, P.; Brabec, C.J. On the effect of poly(3-hexylthiophene) regioregularity on inkjet printed organic solar cells. *J. Mater. Chem.* **2009**, *19*, 5398–5404, doi:10.1039/B823495G.
28. Eom, S.H.; Park, H.; Mujawar, S.H.; Yoon, S.C.; Kim, S.S.; Na, S.I.; Kang, S.J.; Khim, D.; Kim, D.Y.; Lee, S.H. High efficiency polymer solar cells via sequential inkjet-printing of PEDOT:PSS and P3HT:PCBM inks with additives. *Org. Electron.* **2010**, *11*, 1516–1522, doi:10.1016/j.orgel.2010.06.007.
29. Sun, Y.; Zhang, Y.; Liang, Q.; Zhang, Y.; Chi, H.; Shi, Y.; Fang, D. Solvent inkjet printing process for the fabrication of polymer solar cells. *RSC Adv.* **2013**, *3*, 11925–11934, doi:10.1039/C3RA22659J.
30. Sumaiya, S.; Kardel, K.; El-Shahat, A. Organic solar cell by inkjet printing—An overview. *Technologies* **2017**, *5*, 53, doi:10.3390/technologies5030053.
31. Espinosa, N.; García-Valverde, R.; Urbina, A.; Lenzmann, F.; Manceau, M.; Angmo, D.; Krebs, F.C. Life cycle assessment of ITO-free flexible polymer solar cells prepared by roll-to-roll coating and printing. *Sol. Energy Mater. Sol. Cells* **2012**, *97*, 3–13, doi:10.1016/j.solmat.2011.09.048.

32. Galagan, Y.; Coenen, E.W.C.; Sabik, S.; Gorter, H.H.; Barink, M.; Veenstra, S.C.; Kroon, J.M.; Andriessen, R.; Blom, P.W.M. Evaluation of ink-jet printed current collecting grids and busbars for ITO-free organic solar cells. *Sol. Energy Mater. Sol. Cells* **2012**, *104*, 32–38, doi:10.1016/j.solmat.2012.04.039.
33. Galagan, Y.; Coenen, E.W.C.; Abbel, R.; van Lammeren, T.J.; Sabik, S.; Barink, M.; Meinders, E.R.; Andriessen, R.; Blom, P.W.M. Photonic sintering of inkjet printed current collecting grids for organic solar cell applications. *Org. Electron.* **2013**, *14*, 38–46, doi:10.1016/j.orgel.2012.10.012.
34. Lee, J.-W.; Na, S.-I.; Kim, S.-S. Efficient spin-coating-free planar heterojunction perovskite solar cells fabricated with successive brush-painting. *J. Power Sources* **2017**, *339*, 33–40, doi:10.1016/j.jpowsour.2016.11.028.
35. Liang, C.; Li, P.; Gu, H.; Zhang, Y.; Li, F.; Song, Y.; Shao, G.; Mathews, N.; Xing, G. One-step inkjet printed perovskite in air for efficient light harvesting. *Sol. RRL* **2018**, *2*, 1700217, doi:10.1002/solr.201700217.
36. Hashmi, S.G.; Martineau, D.; Li, X.; Ozkan, M.; Tiihonen, A.; Dar, M.I.; Sarikka, T.; Zakeeruddin, S.M.; Paltakari, J.; Lund, P.D.; et al. Air processed inkjet infiltrated carbon based printed perovskite solar cells with high stability and reproducibility. *Adv. Mater. Technol.* **2017**, *2*, 1600183, doi:10.1002/admt.201600183.
37. Hashmi, S.G.; Tiihonen, A.; Martineau, D.; Ozkan, M.; Vivo, P.; Kaunisto, K.; Ulla, V.; Zakeeruddin, S.M.; Grätzel, M. Long term stability of air processed inkjet infiltrated carbon-based printed perovskite solar cells under intense ultra-violet light soaking. *J. Mater. Chem. A* **2017**, *5*, 4797–4802, doi:10.1039/C6TA10605F.
38. Wei, Z.; Chen, H.; Yan, K.; Yang, S. Inkjet printing and instant chemical transformation of a CH<sub>3</sub>NH<sub>3</sub>PbI<sub>3</sub>/nanocarbon electrode and interface for planar perovskite solar cells. *Angew. Chem. Int. Ed.* **2014**, *53*, 13239–13243, doi:10.1002/anie.201408638.
39. Bag, M.; Jiang, Z.; Renna, L.A.; Jeong, S.P.; Rotello, V.M.; Venkataraman, D. Rapid combinatorial screening of inkjet-printed alkyl-ammonium cations in perovskite solar cells. *Mater. Lett.* **2016**, *164*, 472–475, doi:10.1016/j.matlet.2015.11.058.
40. Gheno, A.; Huang, Y.; Bouclé, J.; Ratier, B.; Rolland, A.; Even, J.; Vedraïne, S. Toward highly efficient inkjet-printed perovskite solar cells fully processed under ambient conditions and at low temperature. *Sol. RRL* **2018**, *2*, 1800191, doi:10.1002/solr.201800191.
41. Alamri, A.M.; Leung, S.; Vaseem, M.; Shamim, A.; He, J. Fully inkjet-printed photodetector using a graphene/perovskite/graphene heterostructure. *IEEE Trans. Electron Devices* **2019**, *66*, 2657–2661, doi:10.1109/TED.2019.2911715.
42. Chen, S.; Zhang, L.; Yan, L.; Xiang, X.; Zhao, X.; Yang, S.; Xu, B. Accelerating the screening of perovskite compositions for photovoltaic applications through high-throughput inkjet printing. *Adv. Funct. Mater.* **2019**, *29*, 1905487, doi:10.1002/adfm.201905487.
43. Prajontat, P.; Sriprachuabwong, C.; Wongkanya, R.; Dechtrirat, D.; Sudchanham, J.; Srisamran, N.; Sangthong, W.; Chuysinuan, P.; Tuantranont, A.; Hannongbua, S.; et al. Moisture-resistant electrospun polymer membranes for efficient and stable fully printable perovskite solar cells prepared in humid air. *ACS Appl. Mater. Interfaces* **2019**, *11*, 27677–27685, doi:10.1021/acsami.9b05032.
44. Shi, L.; Meng, L.; Jiang, F.; Ge, Y.; Li, F.; Wu, X.; Zhong, H. In situ inkjet printing strategy for fabricating perovskite quantum dot patterns. *Adv. Funct. Mater.* **2019**, *29*, 1903648, doi:10.1002/adfm.201903648.
45. Mathies, F.; Abzieher, T.; Hochstuhl, A.; Glaser, K.; Colsmann, A.; Paetzold, U.W.; Hernandez-Sosa, G.; Lemmer, U.; Quintilla, A. Multipass inkjet printed planar methylammonium lead iodide perovskite solar cells. *J. Mater. Chem. A* **2016**, *4*, 19207–19213, doi:10.1039/C6TA07972E.
46. Xie, M.; Lu, H.; Zhang, L.; Wang, J.; Luo, Q.; Lin, J.; Ba, L.; Liu, H.; Shen, W.; Shi, L.; et al. Fully solution-processed semi-transparent perovskite solar cells with ink-jet printed silver nanowires top electrode. *Sol. RRL* **2018**, *2*, 1700184, doi:10.1002/solr.201700184.
47. Li, P.; Liang, C.; Bao, B.; Li, Y.; Hu, X.; Wang, Y.; Zhang, Y.; Li, F.; Shao, G.; Song, Y. Inkjet manipulated homogeneous large size perovskite grains for efficient and large-area perovskite solar cells. *Nano Energy* **2018**, *46*, 203–211, doi:10.1016/j.nanoen.2018.01.049.
48. Mathies, F.; Eggers, H.; Richards, B.S.; Hernandez-Sosa, G.; Lemmer, U.; Paetzold, U.W. Inkjet-printed triple cation perovskite solar cells. *ACS Appl. Energy Mater.* **2018**, *1*, 1834–1839, doi:10.1021/acsam.8b00222.
49. Huckaba, A.J.; Lee, Y.; Xia, R.; Paek, S.; Bassetto, V.C.; Oveisi, E.; Lesch, A.; King, S.; Dyson, P.J.; Girault, H.; et al. Inkjet-printed mesoporous TiO<sub>2</sub> and perovskite layers for high efficiency perovskite solar cells. *Energy Technol.* **2019**, *7*, 317–324, doi:10.1002/ente.201800905.
50. Pede, D.; Serra, G.; De Rossi, D. Microfabrication of conducting polymer devices by ink-jet stereolithography. *Mater. Sci. Eng. C* **1998**, *5*, 289–291, doi:10.1016/S0928-4931(97)00056-8.
51. Madigan, C.F.; Hebner, T.R.; Sturm, J.C.; Register, R.A.; Troian, S. Lateral dye distribution with ink-jet dye doping of polymer organic light emitting diodes. *MRS Proc.* **2000**, *625*, 123, doi:10.1557/PROC-625-123.
52. Rowe, C.W.; Katstra, W.E.; Palazzolo, R.D.; Giritlioglu, B.; Teung, P.; Cima, M.J. Multimechanism oral dosage forms fabricated by three dimensional printing. *J. Control. Release* **2000**, *66*, 11–17, doi:10.1016/S0168-3659(99)00224-2.
53. Gribkova, O.L.; Kabanova, V.A.; Tameev, A.R.; Nekrasov, A.A. Ink-jet printing of polyaniline layers for perovskite solar cells. *Tech. Phys. Lett.* **2019**, *45*, 858–861, doi:10.1134/S1063785019090050.
54. de Gans, B.-J.; Duineveld, P.C.; Schubert, U.S. Inkjet printing of polymers: state of the art and future developments. *Adv. Mater.* **2004**, *16*, 203–213, doi:10.1002/adma.200300385.
55. Tekin, E.; de Gans, B.-J.; Schubert, U.S. Ink-jet printing of polymers—from single dots to thin film libraries. *J. Mater. Chem.* **2004**, *14*, 2627–2632, doi:10.1039/B407478E.
